# Supplementary material
Source: PubMed Central journal article supplement (PMC2832969)
Supplement: supp_M109.031575_jbc.M109.031575-1.pdf [file supp_M109.031575_jbc.M109.031575-1.pdf]

## Supplementary Experimental Procedures

### Reagents

Hederagenin was obtained from extrasynthese.

## Supplementary Figure Legends

### Supl. Fig. 1

**(A) Silencing of Nrf2 expression in HFL-1 cells.** Immunoblot analysis of the Nrf2 in HFL-1 cells transfected with 75nm Nrf2 siRNA or scrambled siRNA for 48 h, [(i) low and (ii) high exposure]. **(B) Accumulation of Nrf2 upon proteasome inhibition.** Immunoblot analysis of Nrf2 in HFL-1 cells treated with 20  $\mu$ M MG132 for 6h. GAPDH levels were used as loading control. **(C) Low exposure of the Nrf2 immunoblot from Fig. 1B.** Molecular mass markers are indicated on the left side of the Nrf2 blots. **(D) Quantification of the Nrf2 specific bands.** Graphs show the quantification of each specific band of the Nrf2 (1-5) of the immunoblots in (i) Fig. 1B, (ii) Fig 2B, (iv) and (v) Fig. 2C [cytosolic and nuclear fraction, respectively], (vi) Fig. 6E and (vii) Fig.7B. **(Diii, E) Low exposure** of (Diii) the Nrf2 immunoblot shown in Fig. 2C and (E) the  $\beta_2$  immunoblot in the total extracts shown in Fig. 3Di. Statistical significance at  $p < 0.05$  or  $p < 0.01$  are denoted in graphs by a single (\*) or double (\*\*) asterisk, respectively.

### Supl. Fig. 2

**Silencing of Nrf2 expression in HFL-1 cells.** Quantification of RNA expression levels of Nrf2 in HFL-1 cells transfected with 50 or 75nm Nrf2 siRNA (siNrf2) or scrambled siRNA (siCon) for 24 or 48 h. RNA expression levels in HFL-1 cells transfected with scrambled siRNA (siCon) were arbitrary set to 1. Statistical significance at  $p < 0.01$  is denoted in graphs by double (\*\*) asterisks.

### Supl. Fig. 3

**Proteasome activation by 18 $\alpha$ -GA and HED.** (A) Manifold of CT-L proteasome activity in young HFL-1 cells treated with different concentrations of (i) 18 $\alpha$ -GA and (ii) HED for 24 h. (B) Levels of CT-L, PGPH and T-L activities of HFL-1 cells treated with 2  $\mu$ g/ml (i) 18 $\alpha$ -GA, (ii) HED or DMSO for different time points. Use of proteasome inhibitor (MG132) in control reactions ensured the specificity of the enzymatic reaction. Activities in DMSO treated cells were arbitrary set to 1. Statistical significance at  $p < 0.01$  is denoted in graphs by double (\*\*) asterisks.

### Supl. Fig. 4

**Nrf-2 mediated proteasome activation by HED.** (A) Immunoblot analysis and the relative quantification of proteasome subunits ( $\beta_5$ ,  $\beta_1$ ,  $\beta_2$ ,  $\alpha_4$ ) in HFL-1 cells treated with 2  $\mu$ g/ml HED or DMSO for 2 h. GAPDH levels were used as loading control. (Bi) Immunoblot analysis with the relative quantification of representative proteasome subunits ( $\beta_2$ ,  $\alpha_4$ ) in total extracts and the relative elutions following proteasome immunoprecipitation in HFL-1 cells treated with 2  $\mu$ g/ml HED or DMSO for 2 h. (Bii) Levels of CT-L proteasome activity in immunoprecipitated proteasomes of HFL-1 fibroblasts treated with 2  $\mu$ g/ml HED. or DMSO for 2h. Activity or protein levels in DMSO treated cells were arbitrary set to 1. Blank samples represent the control immunoprecipitation samples. Immunoblot analysis of GAPDH (lower panel) in total extracts shows the equal starting protein quantity before immunoprecipitation. (C) Immunoblot analysis of Nrf2 and the relative quantifications of (i) all Nrf2 specific bands together and (ii) each specific band separately, in nuclear extracts of HFL-1 cells treated with 2  $\mu$ g/ml HED or DMSO for 2 h. Lamin A/C was used as marker of nuclear fraction.

Molecular mass markers are indicated on the left side of the immunoprecipitation experiment and the Nrf2 blot. Statistical significance at  $p < 0.05$  or  $p < 0.01$  are denoted in graphs by a single (\*) or double (\*\*) asterisk, respectively.

**Supplementary Table 1.** Primers used for Real-Time PCR analysis. h: human, m: mouse; R: reverse; F: forward.

| Primers                          | Sequence                     |
|----------------------------------|------------------------------|
| <b>h GAPDH-R</b>                 | 5'-CATGGGTGGAATCATATTGGAA-3' |
| <b>h GAPDH-F</b>                 | 5'-GAAGGTGAAGGTCGGAGT-3'     |
| <b>h Nrf2-R</b>                  | 5'-GACCGGGAATATCAGGAACA-3'   |
| <b>h Nrf2-F</b>                  | 5'-AAACCAGTGGATCTGCCAAC-3'   |
| <b>h Nqo1-R</b>                  | 5'-GGTGGATCACGCCTGTAAT-3'    |
| <b>h Nqo1-F</b>                  | 5'-AGTGCAGTGGTGTGATCTCG-3'   |
| <b>h <math>\beta_1</math>-R</b>  | 5'-CAAACCTGCACGGCCATGATA-3'  |
| <b>h <math>\beta_1</math>-F</b>  | 5'-GAGGCATTCCTCCAGACTG-3'    |
| <b>h <math>\beta_2</math>-R</b>  | 5'-ACAACCATCCCTTCAGTTGC-3'   |
| <b>h <math>\beta_2</math>-F</b>  | 5'-TGCAAAGAGGGGATACAAGC-3'   |
| <b>h <math>\beta_5</math>-R</b>  | 5'-CATCTCTGTAGGTGGCTTGGT-3'  |
| <b>h <math>\beta_5</math>-F</b>  | 5'-AGGTTCTGGCTCTGTGTATGC-3'  |
| <b>h <math>\alpha_4</math>-R</b> | 5'-ATGGAAAGGCCTACACATCG-3'   |
| <b>h <math>\alpha_4</math>-F</b> | 5'-GGTGGTGTTCGAGGAAAGGA-3'   |
| <b>m GAPDH-R</b>                 | 5'-TGAAGTCGCAGGAGACAACCT-3'  |
| <b>m GAPDH-F</b>                 | 5'-TGAAGGGCATCTTGGGCTAC-3'   |
| <b>m <math>\beta_1</math>-R</b>  | 5'-GATGGCAAAGGACTGTCTTACC-3' |
| <b>m <math>\beta_1</math>-F</b>  | 5'-AAGATCTGATGGCAGGAATCAT-3' |
| <b>m <math>\beta_5</math>-R</b>  | 5'-CATCTCTGTAGGTGGCTTGGT-3'  |
| <b>m <math>\beta_5</math>-F</b>  | 5'-GGGCTCTGGCTCCGTGTATGC-3'  |
| <b>m <math>\alpha_3</math>-R</b> | 5'-GTGCTTATCCCAGCCAATATAC-3' |
| <b>m <math>\alpha_3</math>-F</b> | 5'-GAGCCAATCCCTGTGAGCAG-3'   |
| <b>m <math>\alpha_6</math>-R</b> | 5'-TTCTTCAAGACCATCCAGGAAT-3' |
| <b>m <math>\alpha_6</math>-F</b> | 5'-CTGACCACAAAGAATGTTTCCA-3' |
| <b>m HO-1-R</b>                  | 5'-CCAGAGTGTTTCATTCGAG-3'    |
| <b>m HO-1-F</b>                  | 5'-CACGCATATAACCCGCTACCT-3'  |

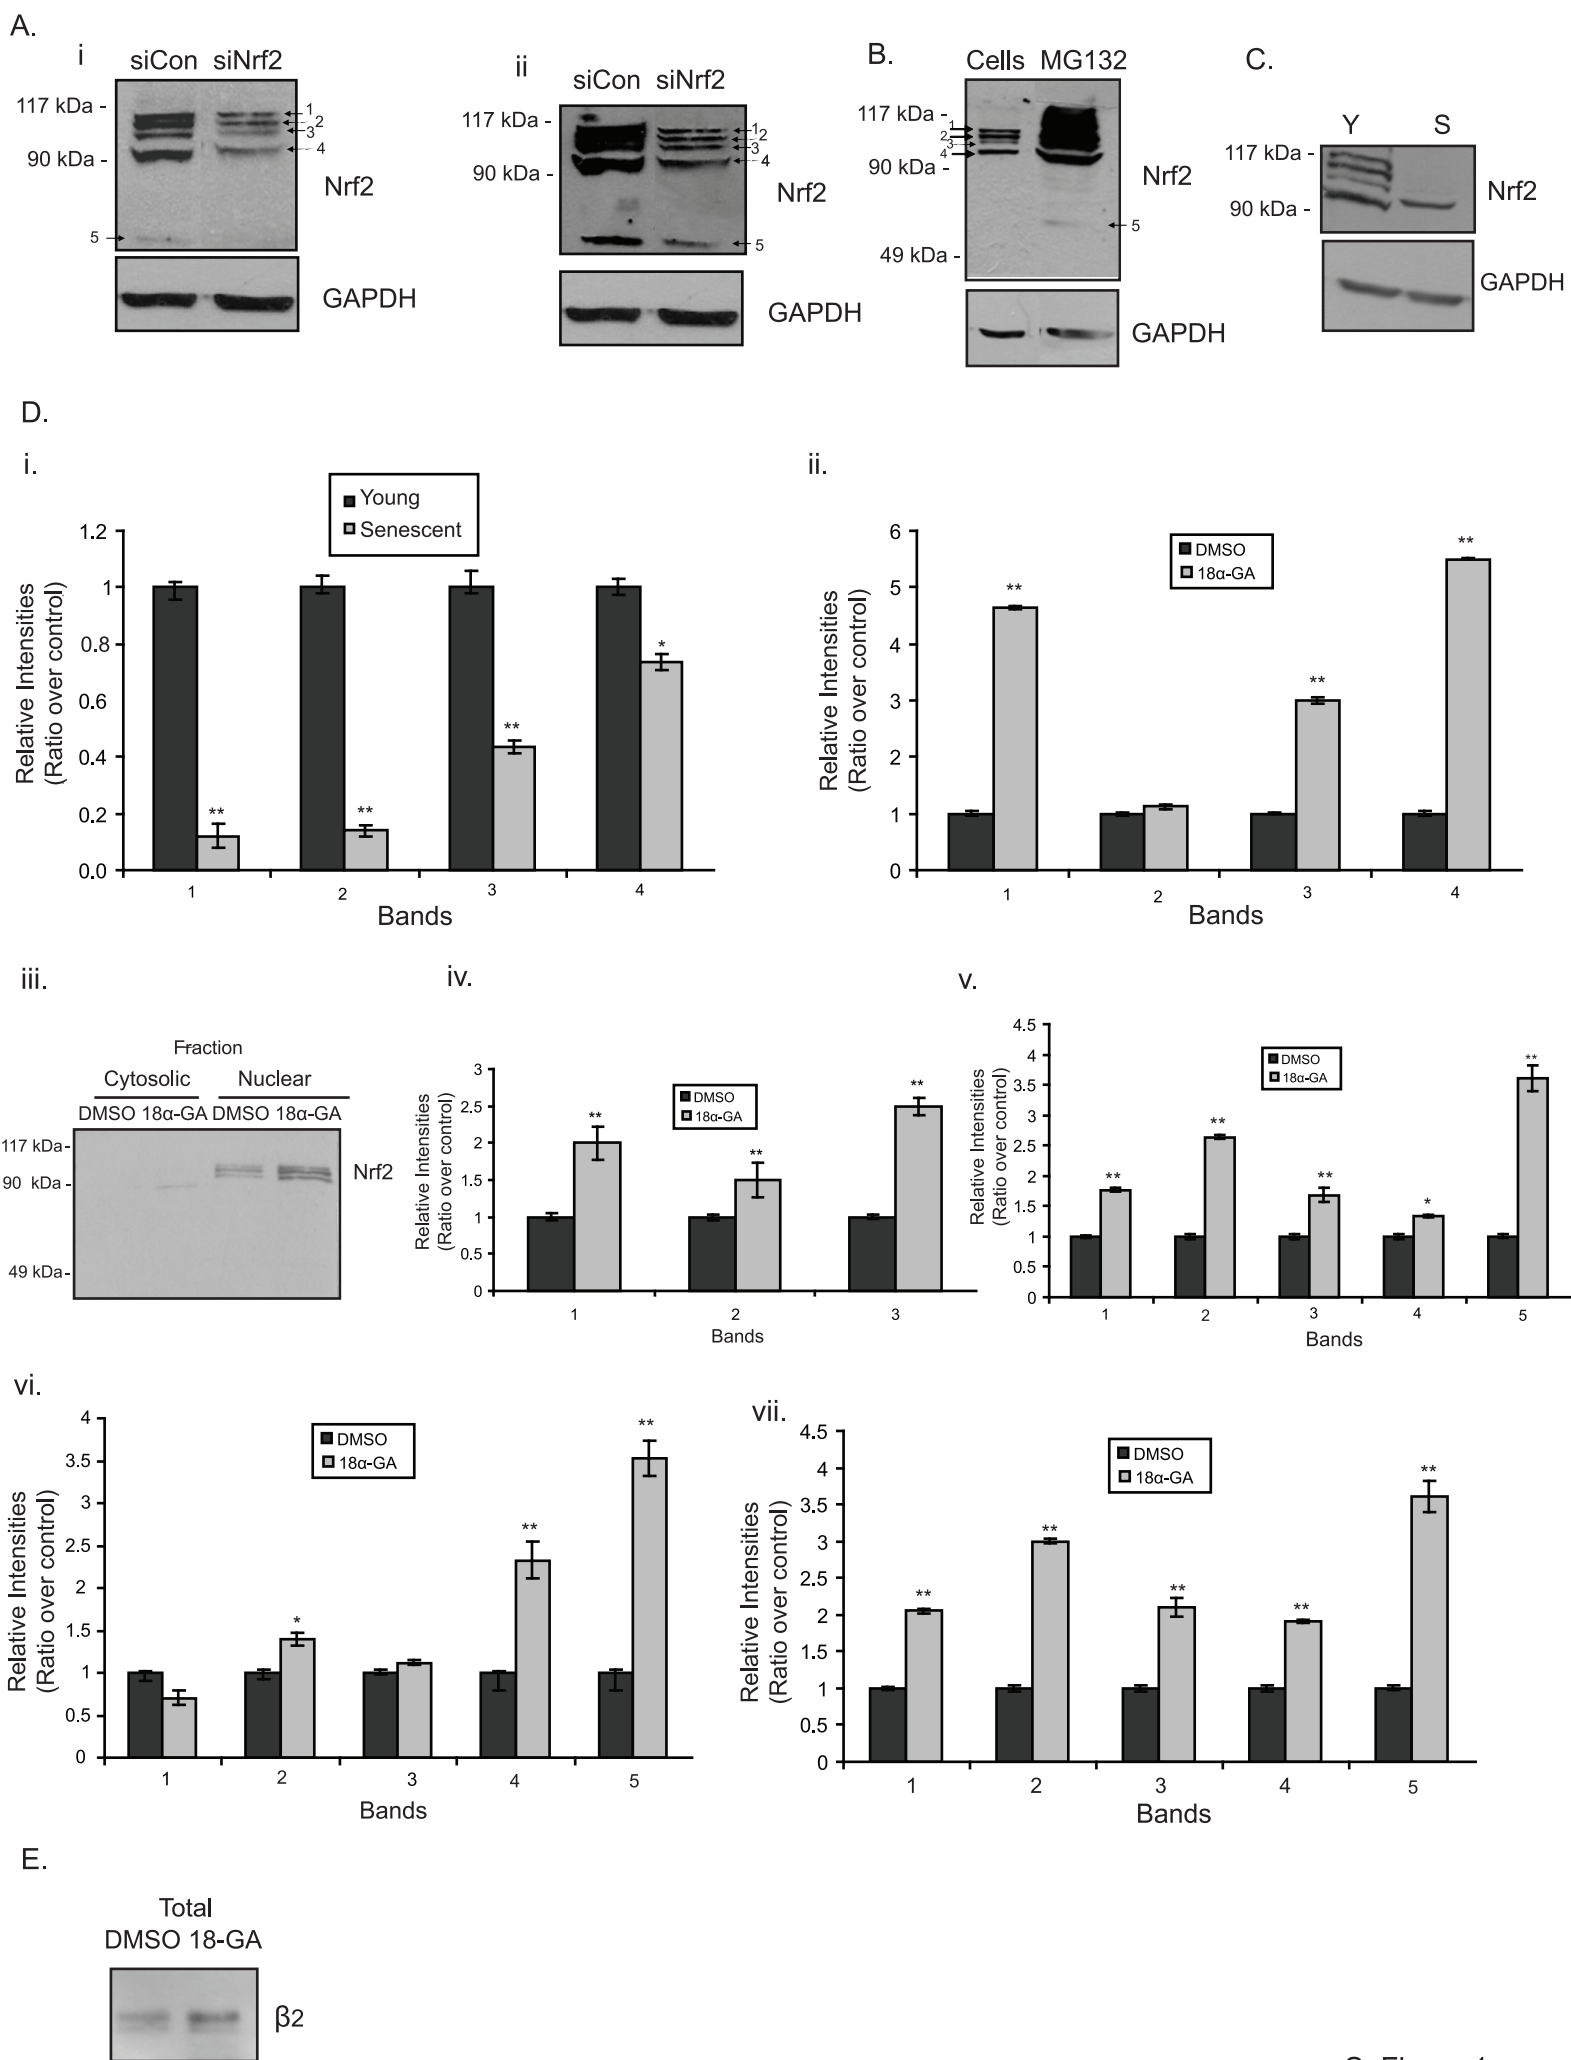

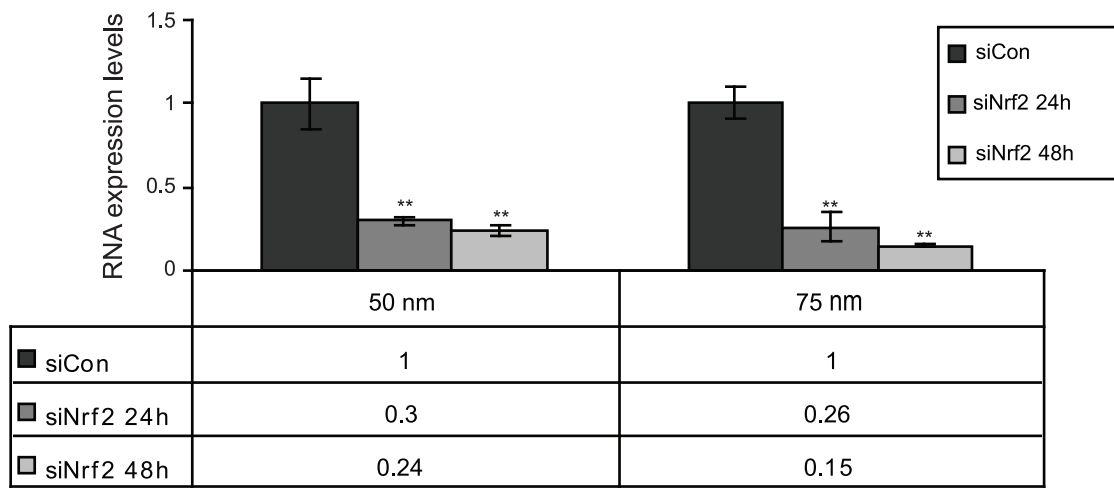

S. Figure 2

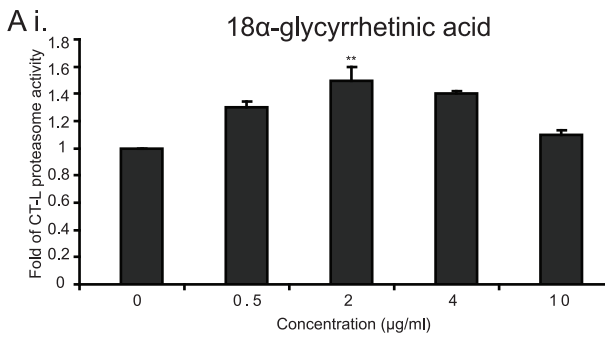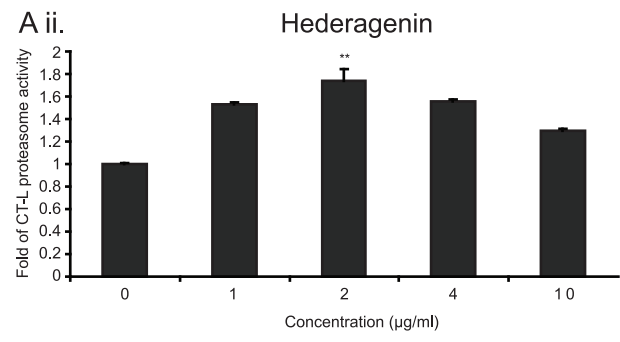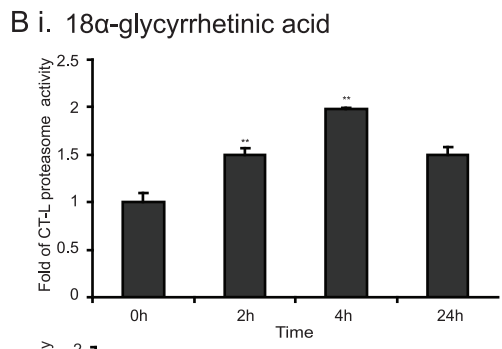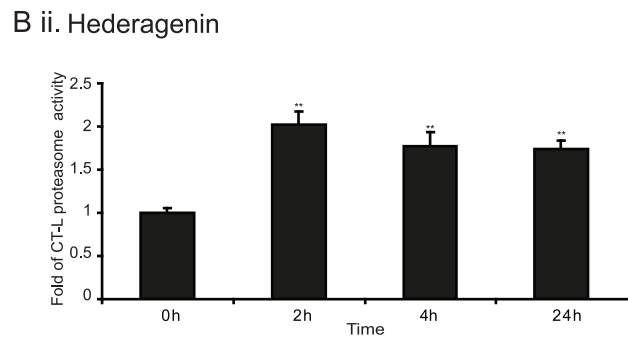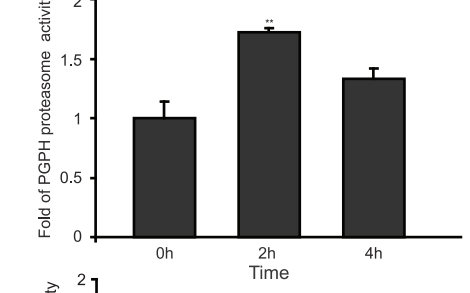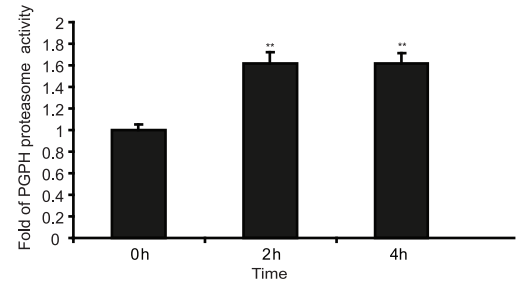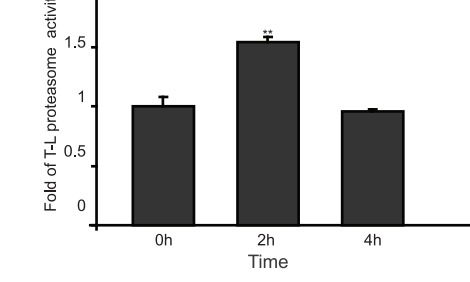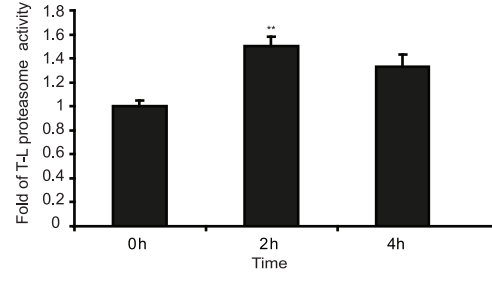

S. Figure 3

A.

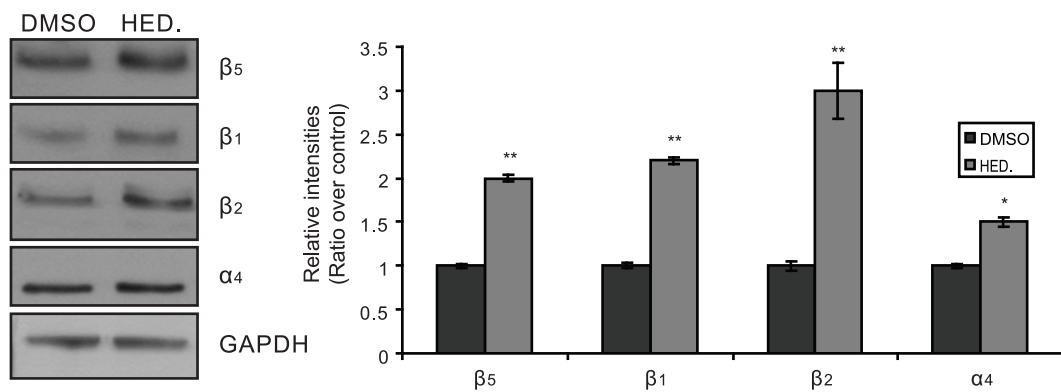

B.

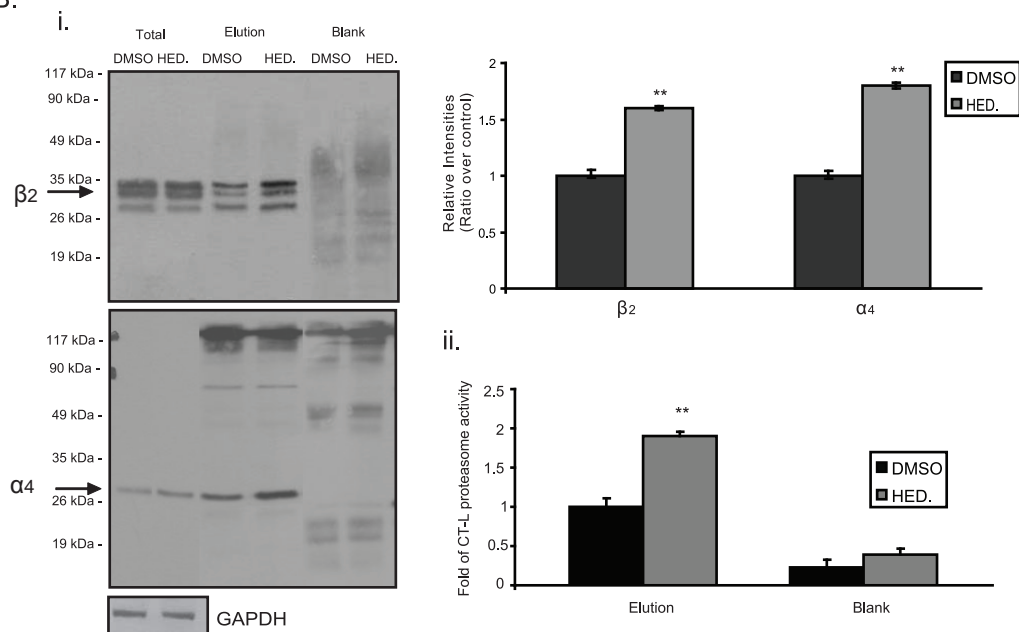

C.

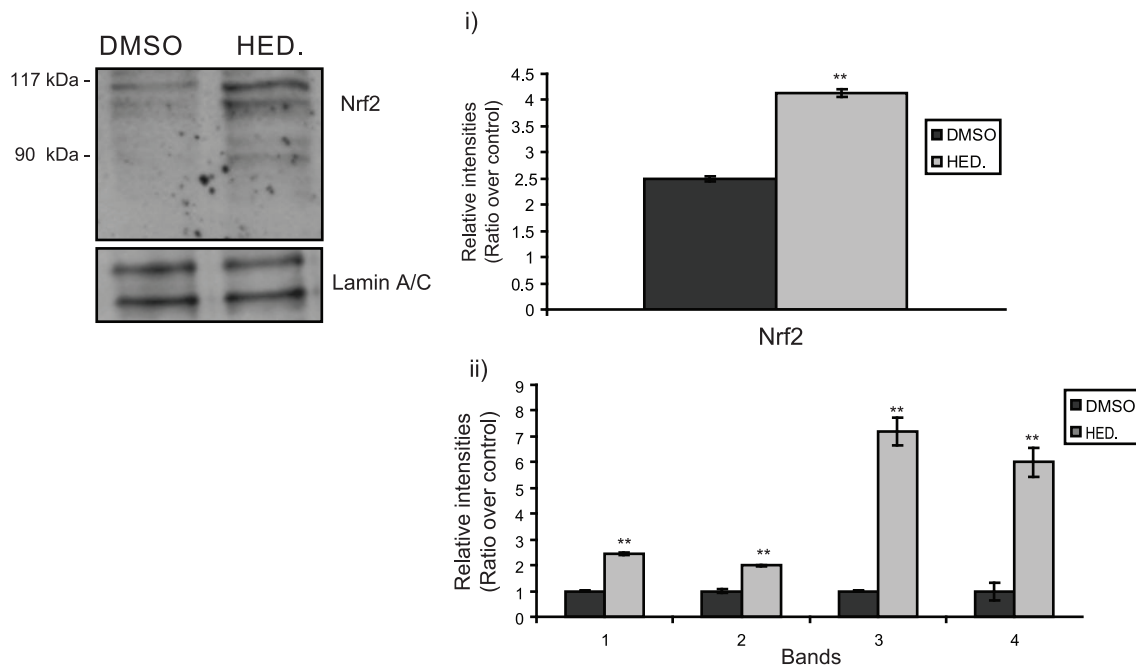

S. Figure 4
